1 **Agmatine accumulation by *Pseudomonas aeruginosa* clinical isolates confers antibiotic**  
2 **tolerance and dampens host inflammation.**

3

4 Jennifer L. McCurtain<sup>a</sup>, Adam J. Gilbertsen<sup>b</sup>, Clayton Evert<sup>a</sup>, Bryan J. Williams<sup>b\*</sup>, Ryan C. Hunter<sup>a#</sup>

5

6 <sup>a</sup>Department of Microbiology & Immunology, University of Minnesota, Minneapolis, MN 55455

7 <sup>b</sup>Pulmonary, Allergy, Critical Care and Sleep Division, University of Minnesota, MN 55455

8 \*Present Address: HealthEast, St. Joseph's Hospital, Saint Paul, MN 55102

9

10 Running Title: Agmatine hyperproduction by *Pseudomonas aeruginosa*

11 # Address correspondence to Ryan C. Hunter, [rchunter@umn.edu](mailto:rchunter@umn.edu)

12 **ABSTRACT**

13 In the cystic fibrosis (CF) airways, *Pseudomonas aeruginosa* undergoes diverse physiological changes  
14 in response to inflammation, antibiotic pressure, oxidative stress and a dynamic bioavailable nutrient  
15 pool. These include loss-of-function mutations that result in reduced virulence, altered metabolism and  
16 other phenotypes that are thought to confer a selective advantage for long-term persistence. Recently,  
17 clinical isolates of *P. aeruginosa* that hyperproduce agmatine (decarboxylated arginine) were cultured  
18 from individuals with CF. Sputum concentrations of this metabolite were also shown to correlate with  
19 disease severity. This raised the question of whether agmatine accumulation might also confer a  
20 selective advantage for *P. aeruginosa in vivo* during chronic colonization of the lung. Here, we screened  
21 a library of *P. aeruginosa* CF clinical isolates and found that ~5% of subjects harbored isolates with an  
22 agmatine hyperproducing phenotype. Agmatine accumulation was a direct result of mutations in *aguA*,  
23 encoding the arginine deiminase that catalyzes the conversion of agmatine into various polyamines.  
24 We also found that agmatine hyperproducing isolates (*aguA*-) had increased tolerance to the cationic  
25 antibiotics gentamicin, tobramycin and colistin relative to their chromosomally complemented strains  
26 (*aguA*+). Finally, we revealed that agmatine diminishes IL-8 production by airway epithelial cells in  
27 response to bacterial infection, with a consequent decrease in neutrophil recruitment to the murine  
28 airways in an acute pneumonia model. These data highlight a potential new role for bacterial-derived  
29 agmatine that may have important consequences for the long-term persistence of *P. aeruginosa* in the  
30 CF airways.

## 31 INTRODUCTION

32 Cystic fibrosis (CF) is a lethal autosomal recessive disorder characterized by abnormal  
33 transepithelial ion transport and dehydrated mucus lining the epithelium of several organs, including the  
34 lung (1). Within the airways, compromised innate immunity and impaired mucociliary transport facilitate  
35 chronic colonization by variety of microorganisms that are the major cause of patient morbidity (2,3).  
36 Though recent culture-independent surveys have revealed complex CF lung microbiota consisting of  
37 hundreds of bacterial species (4-6), *P. aeruginosa* remains widely recognized as the primary driver of  
38 disease progression (7). This bacterium is prevalent among 70-80% of CF adults (8), can reach  
39 densities as high as  $10^9$  cells/gm of sputum despite aggressive antimicrobial therapies (9), and its  
40 persistence strongly correlates with poor disease outcomes (10,11).

41 As chronic infections progress, *P. aeruginosa* is exposed to selective pressures that include the  
42 host immune response, competing microbiota, xenobiotics, oxidative stress and a dynamic nutritional  
43 milieu. In response, *P. aeruginosa* undergoes substantial genotypic and phenotypic variability. For  
44 example, loss-of-function mutations are commonly found in *lasR*, encoding a transcriptional regulator  
45 of quorum sensing (12). In turn, *P. aeruginosa* clinical isolates exhibit altered expression of QS-  
46 regulated virulence effector molecules such as elastase, siderophores and phenazines (13-16).  
47 Additional mutations in *vfr*, *exsA*, *mutS*, *ampR* and *mucA*, among others, lead to mucoidy, auxotrophy,  
48 altered motility, LPS modifications, hypermutability, and decreased susceptibility to phage,  
49 antimicrobials and phagocytosis (17-24). Each of these phenotypes is thought to confer a selective  
50 advantage for long-term persistence *in vivo* (25).

51 Recently, direct measurements of CF sputum have revealed elevated concentrations ( $>10\mu\text{M}$ )  
52 of agmatine, a pre-polyamine intermediate metabolite of the arginine decarboxylase pathway (Fig.  
53 1)(26). *P. aeruginosa* isolates derived from CF subjects have also been found to accumulate this  
54 metabolite *in vitro*, though the genetic basis of this phenotype has not yet been determined (26).  
55 Previous studies have reported elevated concentrations of the polyamines spermidine and putrescine  
56 (that are derived from agmatine) in CF sputum and bronchoalveolar lavage fluid (27,28). Others have  
57 demonstrated that for *P. aeruginosa*, polyamines contribute to increased resistance to antimicrobials

58 and oxidative stress (29). These observations raised the question: do loss-of-function mutations leading  
59 to agmatine hyperproduction also confer an advantage to *P. aeruginosa* in the context of CF lung  
60 infection?

61 The objectives of this study were two-fold. First, we sought to characterize the frequency of  
62 agmatine hyperproducers among a library of *P. aeruginosa* CF isolates and to determine the genetic  
63 basis of this phenotype. Next, we tested whether agmatine accumulation protects *P. aeruginosa* against  
64 the host immune response and antibiotic stress. We demonstrate that agmatine confers a strain-  
65 dependent persistence advantage in the context of CF lung disease and highlight a potential new role  
66 for agmatine during *P. aeruginosa* infections of the lower airways.

67

## 68 **MATERIALS AND METHODS**

69 **Bacterial strains, human epithelial cells and culture conditions.** Bacterial strains and plasmids  
70 used in this study are presented in Table 1. Strains were routinely cultured at 37°C on Luria Bertani  
71 (LB) medium or Mueller Hinton Broth 2 (MHB-2) as indicated. When necessary, antibiotic  
72 concentrations were added as follows: for *Escherichia coli*, 20 µg/mL tetracycline, 50 µg/mL ampicillin;  
73 for *P. aeruginosa*, 25 µg/mL irgasan, 25-200 µg/mL tetracycline, and 200 µg/mL carbenicillin. Clinical  
74 isolates (one per subject) were derived from stable adult outpatients at Children's Hospital Boston or  
75 the University of Minnesota. Studies were approved by the Committee on Clinical Investigation at CHB  
76 (#09-04-0183) and the Institutional Review Board at UMN (#1008E88194). Cystic fibrosis human  
77 bronchial epithelial cells (CF-DHBE) were acquired from Lonza and cultured using Bronchial Epithelial  
78 Cell Growth Medium (BEGM) and subculturing reagents (Lonza) according to the manufacturer's  
79 protocol. Growth medium was changed every 48h until cells were ~80-90% confluent.

80

81 **Agmatine Biosensor assay.** Clinical isolates were screened for agmatine accumulation using a  
82 modified bioassay described previously (31). Briefly, an agmatine reporter strain defective in agmatine  
83 metabolism (PA14 *aguA:gm Δagu2ABCA' ΔspeA aguRB-lux*) was grown overnight in LB to stationary

84 phase and diluted in fresh LB to a final OD<sub>600</sub> of ~0.2. Spent supernatants from the reporter strain were  
85 used to generate a standard curve, whereby exogenous agmatine (Sigma) was added at a  
86 concentration of 200 μM, followed by serial dilution to 0.2 μM. 100 μL of each standard was added, in  
87 triplicate, to a 96-well microtiter plate. Stationary phase cultures (n=3) of *P. aeruginosa* clinical isolates  
88 (92 strains in total) were then centrifuged at 10,000 x g for 5 min, and 100μL of spent supernatant was  
89 added in triplicate to plates containing the standards. Finally, 100 μL of the reporter strain was added  
90 to each well, plates were covered with a Titer Top seal (Diversified Biotech) to prevent evaporation and  
91 incubated at 37°C for 3h. Luminescence was determined using a BioTek Synergy H1 plate reader and  
92 normalized to culture density (OD<sub>600</sub>) of the reporter strain.

93  
94 **PCR amplification and sequencing of *aguA*.** AccuPrime GC-Rich DNA polymerase kit (Invitrogen)  
95 and primers aguAF and aguAR (Table S1) were used to amplify *aguA* from each clinical isolate. PCR  
96 products were gel purified using QIAquick Gel Extraction kit (Qiagen) and sent to Functional  
97 Biosciences (Madison, WI) or Eurofins Genomics (Louisville, KY) for sequencing.

98  
99 **Plasmid construction and genetic manipulation.** *aguA* from *P. aeruginosa* PA14 (WT gene) was  
100 PCR amplified and cloned into HindIII/SmaI-digested pEX18Tc using primers aguAFHindIII and aguAR  
101 forming pJLM2-WTA. To restore agmatine catabolism in MNPA04, MNPA05, MNPA06, CHB47-6 and  
102 CHB54-11, pJLM2-WTA was transformed into *E. coli* SM10 and mobilized into the clinical isolates.  
103 Recombinants (containing the native *aguA* and intact WT *aguA* gene from strain PA14) were selected  
104 on LB agar containing irgisan (25 μg/mL) and tetracycline (25-200 μg/mL, depending on the isolate).  
105 Colonies were then transferred to LB agar containing 200 μg/mL tetracycline, grown overnight, and  
106 patched to 5% sucrose plates. Genomic DNA from colonies that grew on sucrose was then screened  
107 by PCR and sequenced using primers aguAF and aguAR1 to confirm recombination. *speA* deletion  
108 mutants were generated by cloning and ligating a *speA* knockout construct (31) into HindIII/EcoRI-  
109 digested pEX18Tc using primer pair speAF and speAR, generating pJLM2-ΔspeA. This plasmid was  
110 then transformed into *E. coli* SM10 and mobilized into *P. aeruginosa* as described above.

111 **Antibiotic susceptibility assay.** Minimum inhibitory concentrations of ceftazidime hydrate (Sigma),  
112 doxycycline hyclate (Sigma), gentamicin sulfate (Amresco), tobramycin (Amresco), colistin sulfate  
113 (Santa Cruz Biotechnology), and piperacillin sodium (Gold Biotechnology) were determined using a  
114 microtiter plate-based assay. Tazobactam (10  $\mu\text{g}/\text{mL}$ ) was also added to the piperacillin treatments.  
115 Briefly, bacterial cultures were grown overnight in LB, diluted to an  $\text{OD}_{600}$  of  $\sim 0.2$ , and further diluted  
116 100-fold in MHB-2. 96-well plates were then prepared with 100  $\mu\text{L}$  of MHB-2 containing two-fold dilutions  
117 of antibiotics, followed by the addition of 100  $\mu\text{L}$  of diluted overnight cultures to each well. Cell-free wells  
118 for each antibiotic and MHB-2 alone (no antibiotics) were used as controls. Plates were sealed with  
119 Titer Top adhesive and placed at  $37^\circ\text{C}$  for 24h. Cell density was measured spectrophotometrically  
120 ( $\text{OD}_{600}$ ) using in a BioTek Synergy H1 plate reader. Strains were tested in triplicate using four technical  
121 replicates per plate. Bacterial densities versus six, 2-fold dilutions of each antibiotic were then fit with  
122 a non-linear regression using a four-parameter logistic function to determine  $\text{IC}_{50}$  values and were  
123 compared using one-way Kruskal-Wallis ANOVA. All statistical analyses were performed in  
124 Graphpad Prism v.6.0.

125

126 **Acute pneumonia mouse model.** Overnight cultures of MNPA04 and MNPA04+*aguA* were grown in  
127 LB, washed once in PBS, and resuspended to an  $\text{OD}_{600}$  of  $\sim 1.0$ . Two groups ( $n=10$ ) of female BALB/c  
128 mice (Jackson Laboratories), aged 8 weeks, were anesthetized using isoflurane (3% at 3L/min) and  
129 challenged intratracheally with 100 $\mu\text{L}$  ( $1 \times 10^8$  c.f.u.) of culture using a 1mL Hamilton syringe and a 22G  
130 x 1.25" catheter (Terumo Medical). After 24h, mice were sacrificed via  $\text{CO}_2$  asphyxiation and cervical  
131 dislocation, followed by bronchoalveolar lavage using 2mL of sterile PBS. Lavage fluid (BAL) was then  
132 serially diluted ten-fold and plated on LB agar + irgisan to quantify *P. aeruginosa* load. A 100  $\mu\text{L}$  aliquot  
133 of BAL was centrifuged in a Cytospin column (ThermoFisher), stained for differential white cell counts,  
134 and neutrophils were quantified using a hemocytometer. Neutrophil counts and BAL colony forming  
135 units were compared using unpaired two-tailed t-tests with Welch's correction. Animal work followed  
136 guidelines of the Association for Assessment and Accreditation of Laboratory Animal Care (AAALAC)  
137 and was approved by the UMN Institutional Animal Care and Use Committee (#1212-30122A).

138 **Epithelial cell culture model.** CF-DHBE bronchial epithelial cells were seeded into 48-well cell culture  
139 plates (Costar) coated with bovine collagen at  $5 \times 10^4$  cells per well in 250 $\mu$ L of BEGM. Cells were  
140 incubated at 37°C in humidified air with 5% CO<sub>2</sub>. Media was replaced every 48h until cells were  
141 confluent on day 10 post-seeding. Prior to treatment, cell cultures were rinsed twice with 250 $\mu$ L  
142 starvation medium (MEM + 0.5% FBS). Cells were then stimulated by adding 10-fold dilutions of  
143 agmatine (0.1 – 100  $\mu$ M)(Sigma), 100 ng/mL of LPS from *E. coli* (Sigma), or agmatine plus LPS in  
144 starvation medium to each well. Media-only and media+LPS were used as controls. Treated cells were  
145 incubated for an additional 24h, followed by collection of supernatants that were frozen at -80°C for  
146 downstream analysis. Supernatants were assayed using the IL-8 Human ProcartaPlex® Simplex Kit  
147 (Thermo) on the Luminex Magpix instrument according to manufacturer’s protocol. Standards were run  
148 in duplicate and test samples were run in triplicate on the same plate. Cytokine concentrations were  
149 compared using a non-parametric Friedman’s test with Dunn’s multiple comparison post-test.

150

## 151 **RESULTS**

152 **Agmatine accumulation among *P. aeruginosa* CF isolates.** Given the elevated concentrations of  
153 agmatine detected within expectorated sputum and the identification of overproducing strains (26), we  
154 first tested our hypothesis that agmatine accumulation (herein referred to as “hyperproduction”) is a  
155 common phenotype among *P. aeruginosa* CF isolates. To evaluate its frequency, we used a previously  
156 described biosensor assay (31) to quantify agmatine production among a strain library comprising 92  
157 CF airway isolates. Isolates were grown to stationary-phase, and supernatants were added to an  
158 agmatine-sensitive bioluminescent reporter derivative of *P. aeruginosa* PA14 (31). Luminescence was  
159 then quantified after 3h and normalized to culture density of the reporter strain (Fig. 2). Of ninety-two  
160 isolates tested, five (5.4%) were found to produce agmatine above the detectable threshold of  $\sim 1 \mu$ M,  
161 including three that were identified previously (26). These concentrations were equal to or above those  
162 produced by PA14 $\Delta$ aguA $\Delta$ agu2A $\Delta$ agu2A’, an agmatine hyperproducing lab strain used in the  
163 development and validation of the assay (31).

164 Since *aguA* encodes a deiminase that catalyzes the conversion of agmatine to N-carbamoyl  
165 putrescine (Fig. 1), we predicted that mutations at this locus were responsible for agmatine  
166 accumulation. To test this, *aguA* was PCR amplified from each isolate and sequenced. Interestingly,  
167 MNPA04, MNPA05, and MNPA06 each harbored an identical 11 base pair deletion in *aguA* (Fig. S1),  
168 which may be indicative of patient-to-patient transmission of an agmatine-hyperproducing common  
169 ancestor. CHB47-6 and CHB54-11 also harbored 8-bp and 14-bp deletions, respectively, at the 3' end  
170 of *aguA* (Fig. S1). Each of these deletions results in a frameshift mutation in the downstream catalytic  
171 site of the deiminase. Notably, none of the five hyperproducing isolates contained the alternate  
172 *agu2ABCA'* operon (encoding two additional agmatine deiminases) found in ~20% of *P. aeruginosa*  
173 isolates (32), suggesting that mutations identified in *aguA* were responsible for the agmatine  
174 hyperproduction phenotype. Indeed, when an intact copy of *aguA* was cloned from strain PA14 and  
175 mobilized via allelic exchange into the *aguA* mutant isolates, agmatine catabolism was restored as  
176 determined by the biosensor assay (Fig. 2).

177

178 **Agmatine hyperproduction confers increased tolerance to cationic antibiotics.** The isolation of  
179 *aguA* mutants from multiple subjects raised the question of whether agmatine hyperproduction is  
180 another example of a loss-of-function phenotype that confers a fitness advantage. For example, does  
181 agmatine decrease susceptibility to positively charged antibiotics that destabilize the Gram-negative  
182 outer membrane? This question was raised, in part, based on prior reports of exogenously added  
183 spermidine and putrescine conferring protection to *P. aeruginosa* from polymixin B (29, 35). This was  
184 likely due to increased stability of lipopolysaccharide (LPS) via the polycationic charge of the polyamines  
185 (29). Though agmatine is a pre-polyamine, it also harbors a dipositive charge, and we hypothesized  
186 that its production by the *aguA*- clinical isolates confers a similar protective effect.

187 Using a microtiter plate-based assay, the minimum inhibitory concentration and IC50 (antibiotic  
188 concentration needed to halve the bacterial density at 24h) (36) of three commonly used CF antibiotics  
189 with a polycationic charge (colistin, tobramycin, and gentamicin) were determined for MNPA04 and its  
190 isogenic *aguA*<sup>+</sup> strain. To ensure that any observed phenotype was specific for agmatine accumulation



191 (and not due to a defect in arginine catabolism), we also generated a MNPA04 $\Delta$ *speA* mutant lacking  
192 the arginine decarboxylase (SpeA) required for the first dedicated step of the pathway (see Fig. 1).  
193 While there was no difference in MIC for any of the compounds tested (data not shown), there was a  
194 significant increase in IC50 for each antibiotic versus the agmatine hyperproducer relative to the  
195 complemented *aguA*+ strain (Fig. 3A, Table 2). This phenotype was not observed in MNPA04 $\Delta$ *speA*,  
196 suggesting that the observed decreases in antibiotic susceptibility were a direct result of agmatine  
197 accumulation.

198 As demonstrated previously for spermidine and putrescine (29,35), we predicted that the  
199 dipositive charge of agmatine impeded the interaction of cationic antibiotics with the negatively charged  
200 bacterial cell surface. To test this, we treated MNPA04, MNPA04+*aguA* and MNPA04 $\Delta$ *speA* with three  
201 additional CF antibiotics that carry a net neutral or negative charge at physiological pH; ceftazidime,  
202 piperacillin, and doxycycline (Fig. 3B, Table 2). As predicted, there were no significant changes in IC50  
203 for the neutral or electronegative compounds, supporting the hypothesis that agmatine hyperproduction  
204 decreases *P. aeruginosa* susceptibility to cationic antibiotics due its dipositive charge.

205 Interestingly, resistance phenotypes were strain-dependent; when tobramycin, gentamicin and  
206 colistin were tested against other mutant isolates identified in our screen, agmatine conferred increased  
207 resistance in just three of five strains (Table S2). Strain-to-strain variability was not observed for the  
208 neutral and negatively charged compounds. Notably, the two isolates for which increased resistance to  
209 the aminoglycosides (tobramycin and gentamicin) was not found also had observable phenotypes that  
210 may also contribute to antibiotic tolerance – pyomelanin hyperproduction (MNPA06) and mucoidy  
211 (CHBPA54-11)(Fig.S3)(37-39). It is possible that these and/or other phenotypic characteristics affect  
212 the agmatine-antibiotic interaction that was observed for MNPA04, MNPA05, and CHB47-6.  
213 Nevertheless, the data suggest that deletions in *aguA* and the consequent accumulation of agmatine  
214 may be beneficial for some *P. aeruginosa* clinical isolates.

215

216 **Mouse pneumonia model.** Murine models have revealed both a beneficial and detrimental role  
217 of agmatine in reducing acute lung injury through modulation of inflammatory cytokines (26, 40).

218 However, agmatine has also been shown to reduce macrophage TNF- $\alpha$  and MIP-2 response to  
219 bacterial LPS (26). This led to our hypothesis that in a murine acute pneumonia model, the airway  
220 inflammatory response to agmatine hyperproducing clinical isolates (*aguA*-) of *P. aeruginosa* would  
221 also be dampened relative to *aguA*+ strains. To test this hypothesis, BALB/c mice were challenged  
222 intratracheally with either MNPA04 or MNPA04+*aguA* for 24h, followed by quantification of neutrophil  
223 recruitment into the airways. On average, MNPA04 recruited 40% fewer neutrophils than the *aguA*+  
224 strain ( $P = 0.002$ , Figure 4A). To determine whether this decrease was a result of impaired bacterial  
225 growth *in vivo*, *P. aeruginosa* colony forming units in BAL were also quantified. Consistent with previous  
226 studies (41), a three-log reduction in colony forming units was observed relative to the inoculum after  
227 24h, yet there was no significant difference between treatment groups ( $P=0.48$ , Figure 4B). These data  
228 suggest that despite a reduction of initial bacterial load, neutrophil recruitment is impaired by *P.*  
229 *aeruginosa* agmatine hyperproduction.

230

231 **Epithelial cell model.** Neutrophil recruitment to a site of infection is predominately mediated by  
232 the pro-inflammatory cytokine IL-8 in response to pathogen associated molecular patterns (PAMPs)(42-  
233 44). Therefore, we speculated that the observed decrease in neutrophil recruitment *in vivo* was a result  
234 of *P. aeruginosa*-derived agmatine diminishing MIP-2 (the murine version of IL-8) production. To test  
235 this, primary CF-DHBE airway epithelial cells (AECs) that were homozygous for  $\Delta F508$  in the gene  
236 encoding the cystic fibrosis transmembrane regulator (CFTR) protein were treated with  
237 lipopolysaccharide (100 ng/mL) in the presence of increasing concentrations of agmatine (1-100  $\mu$ M),  
238 followed by quantification of IL-8 production in the AEC culture supernatant (Fig. 5). Relative to AECs  
239 treated with LPS treatment alone (2.8 ng/mL), IL-8 levels were significantly reduced for AECs treated  
240 with LPS+100 $\mu$ M agmatine (1.2 ng/mL;  $P = 0.02$ ). These IL-8 levels were comparable to media and  
241 media+agmatine controls, suggesting that agmatine can reduce the pro-inflammatory response of  
242 AECs to bacterial infection. These data corroborate our *in vivo* observations of the host response to  
243 agmatine hyperproducing clinical isolates of *P. aeruginosa*. Furthermore, they support our hypothesis

244 that agmatine may confer an *in vivo* persistence advantage for *P. aeruginosa* in the context of CF lung  
245 infection.

246

## 247 **DISCUSSION**

248 Polyamines are low molecular weight polycations ubiquitously found in all living cells. Owing to  
249 their regularly-spaced positive charges, these metabolites play critical roles in cell growth and  
250 proliferation, transcription and translation, signal transduction, ion transport and other cellular processes  
251 (45, 46). An important precursor to polyamine formation, agmatine, is a polycationic intermediate of the  
252 arginine decarboxylase pathway for which diverse roles have also evolved. In mammals, for example,  
253 agmatine exerts its effect at multiple targets, including matrix metalloprotease and NADPH oxidase  
254 regulation, neuro- and immunomodulation, and nitric oxide synthesis (26,47-49). Recently, agmatine  
255 was also proposed as an environmental trigger for *P. aeruginosa* biofilm formation (32), as growth of  
256 strain PA14 in the presence of exogenous agmatine showed a dose-dependent increase in biofilm  
257 development, while deletion of both *aguA* and *agu2ABCA'* (encoding redundant agmatine deiminases  
258 that convert agmatine into N-carbamoylputrescine, Fig. 1) showed a significant increase in biomass  
259 relative to WT. Here we demonstrate that *aguA*- mutants of *P. aeruginosa* that hyperproduce agmatine  
260 are frequently isolated from the airways of CF patients. Moreover, we present evidence that agmatine  
261 accumulation in the extracellular milieu may confer multiple selective advantages for persistence of *P.*  
262 *aeruginosa in vivo*.

263 Smith et al. (15) demonstrated that during chronic airway infection, *P. aeruginosa* undergoes  
264 adaptive evolution through genomic variation, and that a large number of genes are targets for mutation.  
265 Mutations in the gene encoding the key quorum-sensing regulator, *lasR*, are especially common, and  
266 lead to defects in the production of key virulence effector compounds (12). Loss-of-function adaptations  
267 in *gacS*, *retS*, *mutS*, *mucA* and *ampR* (50-53) also increase in prevalence as infections progress and  
268 reflect the transition of *P. aeruginosa* from an acute to chronic infection phenotype. Many of these  
269 examples are mutated in only a small fraction of infections (15), which is consistent with the prevalence  
270 of *aguA* mutations (~5%) among our isolate library. While this recovery rate is not nearly as high as QS-

271 deficient (*lasR*), mucoid (*mucA*) or hypermutator (*mutS*) phenotypes (12,54,55), parallel evolution of  
272 agmatine hyperproduction in *P. aeruginosa* derived from multiple patients suggests positive selection  
273 at the *aguA* locus. Since our isolate library was derived from de-identified sputum samples for which  
274 clinical data were not available, it is unclear whether agmatine hyperproduction is associated with the  
275 transition to chronicity. It is also not known whether *aguA* mutations are selected for by the *in vivo*  
276 microenvironment, or if *aguA*- environmental isolates are better poised for airway colonization. Future  
277 studies aimed at a larger patient cohort with detailed clinical data will help address these questions.

278         The observed decrease in susceptibility of *aguA*- strains to both aminoglycosides (gentamicin,  
279 tobramycin) and polymyxins (colistin) suggests that the observed effect is due to a shared characteristic  
280 of the antibiotics (e.g. their positive charge). While primary cellular targets differ, the cationic nature of  
281 both drug classes is thought to increase outer membrane (OM) permeability to lysozyme and  
282 hydrophobic compounds (56,57). The initial action of aminoglycosides has been shown to cause  
283 disruption of salt-bridges between adjacent LPS molecules, disrupting the normal OM packing order  
284 and allowing the compound to then enter the cell and inhibit protein translation (57,58). Similarly,  
285 polyamines carry a polycationic charge that facilitates binding to LPS. However, owing to their small  
286 size, polyamines do not disrupt outer membrane packing or increase OM permeability on their own (58).  
287 In fact, the polyamines spermidine and putrescine have been shown to protect Gram-negatives against  
288 antimicrobials and oxidative stress, in addition to stabilizing spheroplasts and protecting them against  
289 lysis (29, 35, 59, 60). Given that  $\Delta speA$  mutants (defective in arginine decarboxylation) showed no  
290 resistance phenotype and that neutrally charged antibiotics were not affected by *aguA* mutations, we  
291 propose that agmatine also confers resistance to *P. aeruginosa* due to its dipositive charge.

292         The observed strain-to-strain variability suggesting that agmatine-antibiotic inhibition can be  
293 influenced by additional factors was not unexpected. Alginate, for example, has been shown to restrict  
294 the diffusion of aminoglycosides (cationic), but not  $\beta$ -lactams (neutral), through mucoid biofilms of *P.*  
295 *aeruginosa* clinical isolates (61). Elevated concentrations of salts increased aminoglycoside diffusion,  
296 suggesting that electrostatic interactions between cationic compounds and extracellular polymers can  
297 also impact their efficacy (61,62). It remains to be determined whether variations in LPS antigens or the

298 production of the extracellular polysaccharides pel and psl that differ in charge and vary among clinical  
299 isolates, also impact susceptibility to antibiotic challenge in the presence of agmatine (63,64). Likewise,  
300 pyomelanin, an electronegative pigment that is overproduced due to mutations in *hmgA*, exhibits humic-  
301 type properties that allows for chelation of soluble cations (65). It is possible that (in the case of  
302 MNPA06) its polyanionic charge may impact cell surface interactions with polyamines and antibiotics.  
303 We are currently using whole genome sequencing and phenotypic assays of the *aguA*- mutants to  
304 understand how these and other phenotypes (including biofilm formation) influence the protective  
305 effects of agmatine for *P. aeruginosa*.

306 CF airway disease is characterized by chronic, neutrophil-dominated inflammation in response  
307 to bacterial infection. However, *P. aeruginosa* can also use numerous strategies to evade detection and  
308 eradication by the immune system. These include formation of biofilms that prevent phagocytic  
309 clearance, altered expression of PAMPs such that detection by host immune receptors and downstream  
310 signaling is minimized, and direct interference with host signaling through effector molecules (66-67).  
311 In the case of agmatine, impaired recruitment of neutrophils is an example of the latter. More  
312 specifically, we favor the interpretation that the dipositive charge of agmatine prevents binding of LPS  
313 by LPS-binding protein (LBP) and the downstream production of pro-inflammatory cytokines (e.g. IL-8).  
314 These data are consistent with previous reports of diminished MIP-2 production in murine peritoneal  
315 macrophages in response to LPS in the presence of agmatine (26). Given that cationic antimicrobial  
316 peptides have been shown to block LPS-LBP interactions and macrophage cytokine production (68),  
317 our data support a similar mechanism for agmatine.

318 It has been shown that agmatine is capable of both immune activation and inhibition depending  
319 on the presence and dose of co-stimulatory molecules (26). This dichotomy may explain, at least in  
320 part, contrasting phenotypes between the lung adapted isolate MN004 reported here, and those found  
321 for the virulent burn wound isolate PA14 (26) which is known to produce an array of immunostimulatory  
322 exoproducts (e.g. pyocyanin). Similarly, the acute pneumonia model used here revealed no difference  
323 in bacterial load between *aguA*- and *aguA*+ variants of MN004, whereas an agmatine hyperproducing  
324 mutant of PA14 showed a significant *in vivo* growth defect relative to the wildtype (26). These strain-

325 to-strain variations, similar to those observed for antibiotic tolerance, underscore the potential  
326 combinatorial effect of multiple phenotypes on agmatine-mediated interactions of *P. aeruginosa* with its  
327 growth environment.

328 Despite these variations, agmatine hyperproduction has potential consequences for long-term  
329 *P. aeruginosa* persistence *in vivo*. For example, increased tolerance to positively charged therapeutics  
330 would confer a significant growth advantage, particularly in mucus-plugged, diffusion-restricted airways  
331 with sub-inhibitory antibiotic concentrations. Further, by accumulating *aguA* mutations, agmatine  
332 hyperproduction would lead to an impaired ability for the host to mount an adequate reaction aimed at  
333 pathogen clearance, in turn creating an environment that facilitates adaptation and chronic persistence.  
334 Further experiments using a chronic bead model of infection will be used to directly test this possibility.  
335 Either or both of these advantages, coupled with agmatine-mediated biofilm formation reported  
336 previously (32), represent a multifactorial basis for the positive selection for *aguA* mutants and may be  
337 a contributing factor to their success in the CF lung environment.

338  
339 **ACKNOWLEDGEMENTS**

340 This work was supported by National Institutes of Health K08 HL105466 (BJW) and a Pathway to  
341 Independence Award (R00HL11462) awarded to RCH. JLM was supported by a National Institutes of  
342 Health Lung Sciences T32 fellowship (#2T32HL007741-21) awarded through the National Heart Lung  
343 & Blood Institute. We thank Gary Dunny, Yinduo Ji and Scott O'Grady (University of Minnesota) for their  
344 guidance, and members of the Hunter lab for their expertise and critical review of the manuscript.

345 **REFERENCES:**

- 346 1. Kerem BR, Rommens JM, Buchanan JA, Markiewicz D, Cox TK, Chakravarti A, Buchwald M, Tsui  
347 LC. 1989. Identification of the cystic fibrosis gene: genetic analysis. *Science* 245:1073-1080.
- 348 2. Hauser AR, Jain M, Bar-Meir M, McColley SA. 2011. Clinical significance of microbial infection  
349 and adaptation in cystic fibrosis. *Clin Microbiol Rev.* 24:29-70.
- 350 3. Sibley CD, Surette MG. 2011. The polymicrobial nature of airway infections in cystic fibrosis:  
351 Cangene Gold Medal Lecture. *Can J Microbiol.* 57:69-77.
- 352 4. Price KE, Hampton TH, Gifford AH, Dolben EL, Hogan DA, Morrison MG, Sogin ML, O'Toole GA.  
353 2013. Unique microbial communities persist in individual cystic fibrosis patients throughout a  
354 clinical exacerbation. *Microbiome* 1:27
- 355 5. Zhao J, Schloss PD, Kalikin LM, Carmody LA, Foster BK, Petrosino JF, Cavalcoli JD, VanDevaner  
356 DR, Murray S, Li JZ, Young VB, Lipuma JJ. 2012. Decade-long bacterial community dynamics in  
357 cystic fibrosis airways. *Proc Nat Acad Sci USA* 109:5809-5814.
- 358 6. Zemanick ET, Wagner BD, Robertson CE, Stevens MJ, Szeffler SJ, Accurso FJ, Sagel SD, Harris  
359 JK. 2015. Assessment of airway microbiota and inflammation in cystic fibrosis using multiple  
360 sampling methods. *Annals Am Thorac Soc* 12:221-229.
- 361 7. Lyczak JB, Cannon CL, Pier GB. 2000. Establishment of *Pseudomonas aeruginosa* infection:  
362 lessons from a versatile opportunist. *Microb Infect* 2:1051-1060.
- 363 8. Cystic Fibrosis Foundation. 2016. Cystic fibrosis foundation patient registry 2016 annual data  
364 report. Cystic Fibrosis Foundation, Bethesda, MD.
- 365 9. Ciofu O, Riis B, Pressler T, Poulsen HE, Hoiby N. 2005. Occurrence of hypermutable  
366 *Pseudomonas aeruginosa* in cystic fibrosis patients. *Antimicrob Agents Chemother* 49:2276-2282.
- 367 10. Gibson RL, Burns JL, Ramsey BW. 2003. Pathophysiology and management of pulmonary  
368 infections in cystic fibrosis. *Am J Respi Crit Care Med.* 168:918-951
- 369 11. Kosorok MR, Zeng L, West SE, Rock MJ, Splaingard ML, Laxova A, Green CG, Collins J, Farrell  
370 PM. 2001. Acceleration of lung disease in children with cystic fibrosis after *Pseudomonas*  
371 *aeruginosa* acquisition. *Pediatr Pulmonol.* 32:277-87.

- 372 12. Hoffman LR, Kulasekara HD, Emerson J, Houston LS, Burns JL, Ramsey BW, Miller SI. 2009.  
373 *Pseudomonas aeruginosa lasR* mutants are associated with cystic fibrosis lung disease  
374 progression. J Cyst Fib 8:66-70.
- 375 13. D'Argenio DA, Wu M, Hoffman LR, Kulasekara HD, Deziel E, Smith EE, Nguyen H, Ernst RK,  
376 Larson Freeman TH, Spencer DH, Brittnacher M, Hayden HS, Selgrade S, Klausen M, Goodlett  
377 DR, Burns JL, Ramsey BW, Miller SI. 2007. Growth phenotypes of *Pseudomonas aeruginosa*  
378 mutants adapted to the airways of cystic fibrosis patients. Mol Microbiol 64:512-533.
- 379 14. De Vos D, De Chial M, Cochez C, Jansen S, Tummler B, Meyer JM, Cornelis P. 2001. Study of  
380 pyoverdine type and production by *Pseudomonas aeruginosa* isolated from cystic fibrosis patients:  
381 prevalence of type II pyoverdine isolates and accumulation of pyoverdine-negative mutations.  
382 Arch Microbiol. 175:384-388.
- 383 15. Smith EE, Buckley DG, Wu Z, Saenphimmachak C, Hoffman LR, D'Argenio DA, Miller SI, Ramsey  
384 BW, Speert DP, Moskowitz SM, Burns JL. 2006. Genetic adaptation by *Pseudomonas aeruginosa*  
385 to the airways of cystic fibrosis patients. Proc Nat Acad Sci USA. 103:8487-8492.
- 386 16. Cabeen MT. 2014. Stationary phase-specific virulence factor overproduction by a *lasR* mutant of  
387 *Pseudomonas aeruginosa*. PLoS One 9:e88743.
- 388 17. Romling U, Fiedler B, Bosshammer, Grothues D, Greipel J, von der Hardt H, Tummler B. 1994.  
389 Epidemiology of chronic *Pseudomonas aeruginosa* infections in cystic fibrosis. Journal of  
390 Infectious Diseases. 170:1616-1621.
- 391 18. Govan JR, Deretic V. 1996. Microbial pathogenesis in cystic fibrosis: mucoid *Pseudomonas*  
392 *aeruginosa* and *Burkholderia cepacia*. Microbiological Reviews. 50:539-574.
- 393 19. Mahenthalingam E, Campbell ME, Speert DP. 1994. Nonmotility and phagocytic resistance of  
394 *Pseudomonas aeruginosa* from chronically colonized patients with cystic fibrosis. Infect Immun.  
395 62:596-605.
- 396 20. Taylor RF, Hodson ME, Pitt TL. 1992. Auxotrophy of *Pseudomonas aeruginosa* in cystic fibrosis.  
397 FEMS Microbiol Lett 92:243-246.



- 398 21. Hancock RE, Mutharia LM, Chan L, Darveau RP, Speert DP, Pier GB. 1983. *Pseudomonas*  
399 *aeruginosa* isolates from patients with cystic fibrosis: a class of serum-sensitive, nontypable  
400 strains deficient in lipopolysaccharide O side chains. *Infect Immun* 42:170-177.
- 401 22. Spencer DH, Kas A, Smith EE, Raymond CK, Sims EH, Hastings M, Burns JL, Kaul R, Olson MV.  
402 2003. Whole genome sequence variation among multiple isolates of *Pseudomonas aeruginosa*. *J*  
403 *Bacteriol.* 185:1316-1325.
- 404 23. Ernst RK, Moskowitz SM, Emerson JC, Kraig GM, Adams KN, Harvey MD, Ramsey B, Speert DP,  
405 Burns JL, Miller SI. 2007. Unique Lipid A modifications in *Pseudomonas aeruginosa* isolated from  
406 the airways of patients with cystic fibrosis. *J Infect Dis.* 196:1088-1092.
- 407 24. Oliver A, Canton R, Campo P, Baquero F, Blazquez. 2000. High frequency of hypermutable *P.*  
408 *aeruginosa* in cystic fibrosis lung infection. *Science* 288:1251-1253.
- 409 25. Hogardt M, Heesemann J. 2012. Microevolution of *Pseudomonas aeruginosa* to a chronic  
410 pathogen of the cystic fibrosis lung, pp 91-118. *In* Dobrindt, Hacker, Svanborg (ed), *Between*  
411 *pathogenicity and commensalism.* Springer, Berlin, Heidelberg.
- 412 26. Paulson NB, Gilbertsen AJ, Dalluge JJ, Welchlin CW, Hughes J, Han W, Blackwell TS, Laguna  
413 TA, Williams BJ. 2014. The arginine decarboxylase pathways of host and pathogen interact to  
414 impact inflammatory pathways in the lung. *PLoS One* 9:e111441.
- 415 27. Esther CR, Coakley RD, Henderson AG, Zhou YH, Wright FA, Boucher RC. 2015. Metabolomic  
416 evaluation of neutrophilic airway inflammation in cystic fibrosis. *Chest* 148:507-515.
- 417 28. Polineni D, Dang H, Gallins PJ, Jones LC, Pace RG, Stonebraker JR, Commander LA, Krenicky  
418 JE, Zhou YH, Corvol H, Gutting GR. 2018. Airway mucosal host defense is key to genomic  
419 regulation of cystic fibrosis lung disease severity. *Am J Resp Crit Care Med.* 197:79-93.
- 420 29. Johnson L, Mulcahy H, Kanvets U, Shi Y, Lewenza S. 2011. Surface-localized spermidine protects  
421 the *Pseudomonas aeruginosa* outer membrane from antibiotic treatment and oxidative stress. *J*  
422 *Bacteriol.* 194:813-826.
- 423 30. Rahme LG, Stevens EJ, Wolfort SF, Shao J, Tompkins RG, Ausubel FM. 1995. Common  
424 virulence factors for bacterial pathogenicity in plants and animals. *Science.* 268:1899-1902.

- 425 31. Gilbertsen A, Williams B. 2014. Development of a *Pseudomonas aeruginosa* agmatine biosensor.  
426 Biosensors 4:387-402.
- 427 32. Williams BJ, Du RH, Calcutt MW, Abdolrasulnia R, Christman BW, Blackwell TS. 2010. Discovery  
428 of an operon that participates in agmatine metabolism and regulates biofilm formation in  
429 *Pseudomonas aeruginosa*. Mol Microbiol 76:104-119.
- 430 33. de Lorenzo V, Timmis KN. 1994. Analysis and construction of stable phenotypes in Gram-negative  
431 bacteria with Tn5- and Tn10-derived minitransposons. Methods Enzymol 235:386-405.
- 432 34. Hoang TT, Karkhoff-Schweizer RR, Kutchma AJ, Schweizer HP. 1998. A broad host-range Flp-  
433 FRT recombination system for site-specific excision of chromosomally-located DNA sequences:  
434 application for isolation of unmarked *Pseudomonas aeruginosa* mutants. Gene 212:77-86.
- 435 35. Kwon DH, Lu CD. 2006. Polyamines induce resistance to cationic peptide, aminoglycoside, and  
436 quinolone antibiotics in *Pseudomonas aeruginosa*. Antimicrob Agents Chemother 50:1615-1622.
- 437 36. Soothill JS, Ward R, Girling AJ. 1992. The IC50: an exactly defined measure of antibiotic  
438 sensitivity. J Antimicrob Chemother 29:137-139.
- 439 37. Rodriguez-Rojas A, Mena A, Martin S, Borrell N, Oliver A, Blazquez J. 2009. Inactivation of the  
440 *hmgA* gene of *Pseudomonas aeruginosa* leads to pyomelanin hyperproduction, stress resistance  
441 and increased persistence in chronic lung infection. Microbiol 155:1050-1057.
- 442 38. Gordon CA, Hodges NA, Marriott C. 1988. Antibiotic interaction and diffusion through alginate and  
443 exopolysaccharide of cystic fibrosis-derived *Pseudomonas aeruginosa*. J Antimicrob Chemother.  
444 22:667-674.
- 445 39. Hodges NA, Gordon CA. 1991. Protection of *Pseudomonas aeruginosa* against ciprofloxacin and  
446 beta-lactams by homogenous alginate. Antimicrob Agents Chemother 35:2450-2452.
- 447 40. Li X, Liu Z, Jin H, Fan X, Yang X, Tang W, Yan J, Liang H. 2014. Agmatine protects against  
448 zymosan-induced acute lung injury in mice by inhibiting NF-KB-mediated inflammatory response.  
449 Biomed Res Int 583736.
- 450 41. Bragonzi A. 2010. Murine models of acute and chronic lung infection with cystic fibrosis  
451 pathogens. Int J Med Microbiol 300:584-593.

- 452 42. Harada A, Sekido N, Akahoshi T, Wada T, Mukaida N, Matsushima K. 1994. Essential  
453 involvement of interleukin-8 (IL-8) in acute inflammation. *J Leuko Biol.* 56:559-564.
- 454 43. Kunkel SL, Standiford T, Kasahara K, Streiter RM. 1990. Interleukin-8 (IL-8): The major neutrophil  
455 chemotactic factor in the lung. *Exp Lung Res* 17:17-23.
- 456 44. Van Zee KJ, DeForge LE, Fischer E, Marano MA, Kenney J, Remick DG, Lowry SF, Moldawer LL.  
457 1991. IL-8 in septic shock, endotoxemia, and after IL-1 administration. *J Immunol* 146:3478-3482.
- 458 45. Miller-Fleming L, Olin-Sandoval V, Campbell K, Ralser M. 2015. Remaining mysteries of  
459 molecular biology: The role of polyamines in the cell. *J Mol Biol* 427:3389-3406.
- 460 46. Pegg AE. 2016. Functions of polyamines in mammals. *J Biol Chem* 291:14904-14912.
- 461 47. Piletz JE, Aricioglu F, Cheng JT, Fairbanks CA, Gilad VH, Haenisch B, Halaris A, Hong S, Lee JE,  
462 Li J, Liu P, Molderings GJ, Rodrigues ALS, Satriano J, Je Seong G, Wilcox G, Wu N, Gilad GM.  
463 2013. Agmatine: clinical applications after 100 years in translation. *Drug Disc Today* 18:880-893.
- 464 48. Wade CL, Eskridge LL, Nguyen HOX, Kitto KF, Stone LS, Wilcox G, Fairbanks CA. 2009.  
465 Immunoneutralization of agmatine sensitized mice to m-opioid receptor tolerance. *J Pharm Exp*  
466 *Therapeutics* 331:539-546.
- 467 49. Laube G, Bernstein HG. 2017. Agmatine: multifunctional arginine metabolite and magic bullet in  
468 clinical neuroscience. *Biochem J* 474:2619-2640.
- 469 50. Balasubramanian D, Kumari H, Mathee K. 2015. *Pseudomonas aeruginosa* AmpR: an acute-  
470 chronic switch regulator. *Pathog Dis* 73:1-14.
- 471 51. Oliver A, Mena A. 2010. Bacterial hypermutation in cystic fibrosis, not only for antibiotic resistance.  
472 *Clin Microbiol Infect* 16: 798-808.
- 473 52. Winstanley C, O'Brien S, Brockhurst MA. 2016. *Pseudomonas aeruginosa* evolutionary adaptation  
474 and diversification in cystic fibrosis chronic lung infections. 24:327-337.
- 475 53. Ciofu O, Mandsberg LF, Bjarnsholt T, Wasserman T, Hoiby N. 2010. Genetic adaptation of  
476 *Pseudomonas aeruginosa* during chronic lung infection of patients with cystic fibrosis: strong and  
477 weak mutators with heterogeneous genetic backgrounds emerge in mucA and/or lasR mutants.  
478 *Microbiol* 156:1108-1119.

- 479 54. Lutz L, Leao RS, Ferreira AG, Pereira DC, Raupp C, Pitt T, Marques EA, Barth AL. 2013.  
480 Hypermutable *Pseudomonas aeruginosa* in cystic fibrosis patients from two Brazilian cities. J Clin  
481 Microbiol 51:927-930.
- 482 55. Crull MR, Ramos KJ, Caldwell E, Mayer-Hamblett N, Aitken ML, Goss CH. 2016. Change in  
483 *Pseudomonas aeruginosa* prevalence in cystic fibrosis adults over time. BMC Pulmonary Med  
484 16:176.
- 485 56. Storm DR, Rosenthal KS, Swanson PE. 1977. Polymixin and related peptide antibiotics. Annu Rev  
486 Biochem. 46:723-763.
- 487 57. Hancock REW, Wong PGW. 1984. Compounds which increase the permeability of the  
488 *Pseudomonas aeruginosa* outer membrane. Antimicrob Agents Chemother 26:48-52.
- 489 58. Peterson AA, Hancock REW, McGroarty EJ. 1985. Binding of polycationic antibiotics and  
490 polyamines to lipopolysaccharides of *Pseudomonas aeruginosa*. J Bacteriol 164:1256-1261.
- 491 59. Mager J. 1959. The stabilizing effect of spermine and related polyamines and bacterial  
492 protoplasts. Biochim Biophys Acta 36:529-531.
- 493 60. Stevens L. 1967. Studies on the interaction of homologues of spermine with deoxyribonucleic acid  
494 and with bacterial protoplasts. Biochem J. 103:811-815.
- 495 61. Gordon CA, Hodges NA, Marriott C. 1988. Antibiotic interaction and diffusion through alginate and  
496 exopolysaccharide of cystic fibrosis-derived *Pseudomonas aeruginosa*. J Antimicrob Chemother  
497 22:667-674.
- 498 62. Tannenbaum CS, Hastie AT, Higgins ML, Kuepper F, Weinbaum G. 1984. Inability of purified  
499 *Pseudomonas aeruginosa* exopolysaccharide to bind selected antibiotics. Antimicrob Agents  
500 Chemother 25:673-675.
- 501 63. Jennings LK, Storek KM, Ledvina HE, Coulon C, Marmont LS, Sadovskaya I, Secor PR, Tseng  
502 BS, Scian M, Filloux A, Wozniak DJ, Howell PL, Parsek MR. 2015. Pel is a cationic  
503 exopolysaccharide that cross-links extracellular DNA in the *Pseudomonas aeruginosa* biofilm  
504 matrix.

- 505 64. Kadurugamuwa JL, Lam JS, Beveridge TJ. 1993. Interaction of gentamicin with the A band and B  
506 band lipopolysaccharides of *Pseudomonas aeruginosa* and its possible lethal effect. *Antimicrob*  
507 *Agents Chemother* 37:715-721.
- 508 65. Hunter RC, Newman DK. 2010. A putative ABC transporter, *hatABCDE*, is among molecular  
509 determinants of pyomelanin production in *Pseudomonas aeruginosa*. *J Bacteriol* 192:5962-5971.
- 510 66. Cohen TS, Parker D, Prince A. 2015. *Pseudomonas aeruginosa* host immune evasion. In JL  
511 Ramos et al (eds) *Pseudomonas*, pp. 3-23. Springer, Dordrecht.
- 512 67. Lafayette SL, Houle D, Beaudoin T, Wojewodka G, Radzioch D, Hoffman LR, Burns JL, Dandekar  
513 AA, Smalley NE, Chandler JR, Zlosnik JE, Speet DP, Bernier J, Matouk E, Brochiero E, Rousseau  
514 S, Nguyen D. 2015. Cystic fibrosis-adapted *Pseudomonas aeruginosa* quorum sensing *lasR*  
515 mutants cause hyperinflammatory responses. *Sci Advances* 1:e1500199.
- 516 68. Scott MG, Vreugdenhil ACE, Buurman WA, Hancock REW, Gold MR. 2000. Cutting edge:  
517 Cationic antimicrobial peptides block the binding of lipopolysaccharide (LPS) to LPS Binding  
518 Protein. *J Immunol* 164:549-553.
- 519

520  
521

**Table 1.** Bacterial strains and plasmids.

| Parent Strain       | Genotype / Phenotype                                                                                    | Source or Reference |
|---------------------|---------------------------------------------------------------------------------------------------------|---------------------|
| PA14                | Wildtype                                                                                                | 30                  |
|                     | Agmatine reporter, <i>aguA:gm Δagu2ABCA' ΔspeA aguRB-lux</i>                                            | 31                  |
|                     | Agmatine deiminase knockout, <i>ΔaguAΔagu2ABCA'</i>                                                     | 32                  |
| MNPA04              | Agmatine overproducing clinical isolate                                                                 | This study          |
|                     | MNPA04 with intact arginine deiminase, <i>+aguA</i>                                                     | This study          |
|                     | MNPA04 with arginine decarboxylase knockout, <i>ΔspeA</i>                                               | This study          |
| MNPA05              | Agmatine overproducing clinical isolate                                                                 | This study          |
|                     | MNPA05 with intact arginine deiminase, <i>+aguA</i>                                                     | This study          |
|                     | MNPA05 with arginine decarboxylase knockout, <i>ΔspeA</i>                                               | This study          |
| MNPA06              | Agmatine overproducing clinical isolate                                                                 | This study          |
|                     | MNPA06 with intact arginine deiminase, <i>+aguA</i>                                                     | This study          |
|                     | MNPA06 with arginine decarboxylase knockout, <i>ΔspeA</i>                                               | This study          |
| CHB54-11            | Agmatine overproducing clinical isolate                                                                 | This study          |
|                     | CHB54-11 with intact arginine deiminase, <i>+aguA</i>                                                   | This study          |
|                     | CHB54-11 with arginine decarboxylase knockout, <i>ΔspeA</i>                                             | This study          |
| CHB47-6             | Agmatine overproducing clinical isolate                                                                 | This study          |
|                     | CHB47-6 with intact arginine deiminase, <i>+aguA</i>                                                    | This study          |
|                     | CHB47-6 with arginine decarboxylase knockout, <i>ΔspeA</i>                                              | This study          |
| <i>E. coli</i> SM10 | Cloning and mating strain, <i>thi-1, thr leu tonA lacY supE recA::RP4-2-Tc::Mu pir (Km<sup>R</sup>)</i> | 33                  |
| <b>Plasmid</b>      |                                                                                                         |                     |
| pEX18Tc             | multi-host suicide vector, Tet <sup>R</sup> , <i>oriT, sacB, lacZα</i> , MCS from pUC18                 | 34                  |
| pJLM2-WTA           | pEX18Tc with <i>aguA</i> from PA14 WT                                                                   | This study          |
| pJLM2- <i>ΔaguA</i> | pEX18Tc with mutant <i>aguA</i> from MNPA05                                                             | This study          |
| pJLM2- <i>ΔspeA</i> | pEX18Tc with <i>speA</i> knockout construct                                                             | This study          |

522

523 **Table 2.** IC50 values ( $\mu\text{g}/\text{mL}$ ) for the agmatine hyperproducing clinical isolate (MNPA04) of *P. aeruginosa*.

|                     | <b>MNPA04</b> | <b>+aguA</b> | <b><math>\Delta\text{speA}</math></b> | <b>P value</b> |
|---------------------|---------------|--------------|---------------------------------------|----------------|
| <b>Tobramycin</b>   | 0.06          | 0.04         | 0.04                                  | **             |
| <b>Gentamicin</b>   | 0.39          | 0.28         | 0.22                                  | ***            |
| <b>Colistin</b>     | 0.17          | 0.08         | 0.1                                   | *              |
| <b>Ceftazidime</b>  | 14.62         | 17.1         | 16.24                                 | ns             |
| <b>Piperacillin</b> | 5.25          | 4.72         | 5.71                                  | ns             |
| <b>Doxycycline</b>  | 0.47          | 0.35         | 0.31                                  | ns             |

524  
525

526

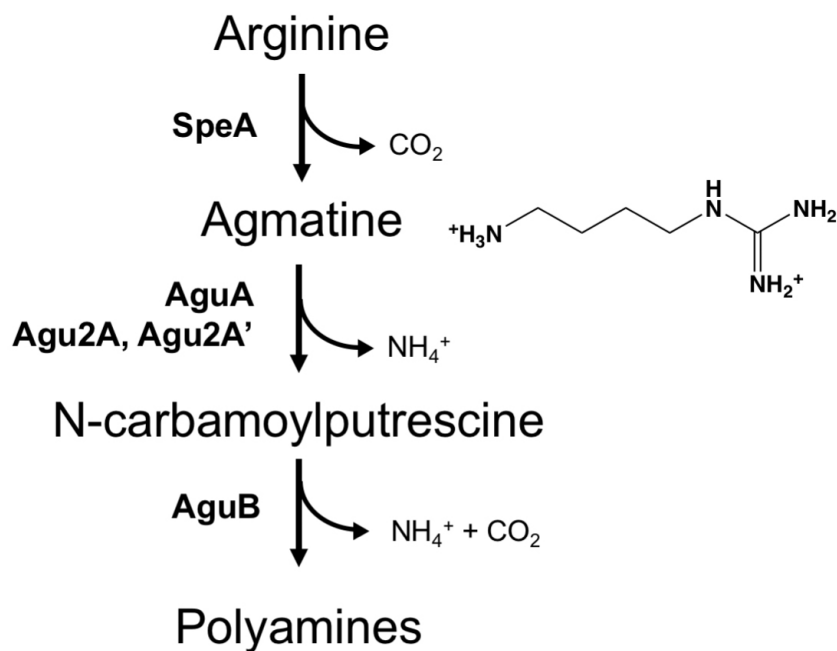

527

528 **Figure 1. Arginine metabolism in *P. aeruginosa*.** Agmatine is a pre-polyamine intermediate metabolite of the  
529 arginine decarboxylation pathway. Its hyperproduction results from mutations in *aguA*, encoding agmatine  
530 deiminase.

531



532

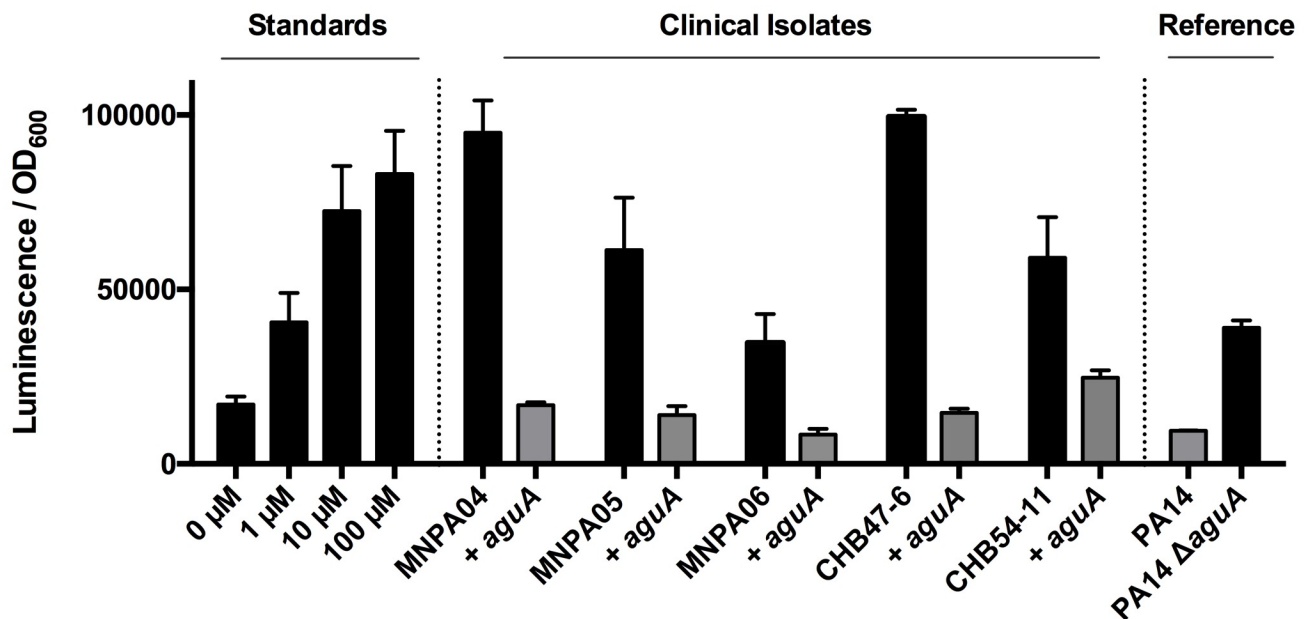

533  
534

535

536

537

538

**Figure 2. Agmatine biosensor assay of *P. aeruginosa* clinical isolates.** Agmatine hyperproduction was detected in 5/92 clinical isolates (black bars). Data shown are the mean (n=3) luminescence normalized to biosensor culture density. Chromosomal complementation with intact *aguA* from PA14 restores agmatine metabolism (grey bars).

539

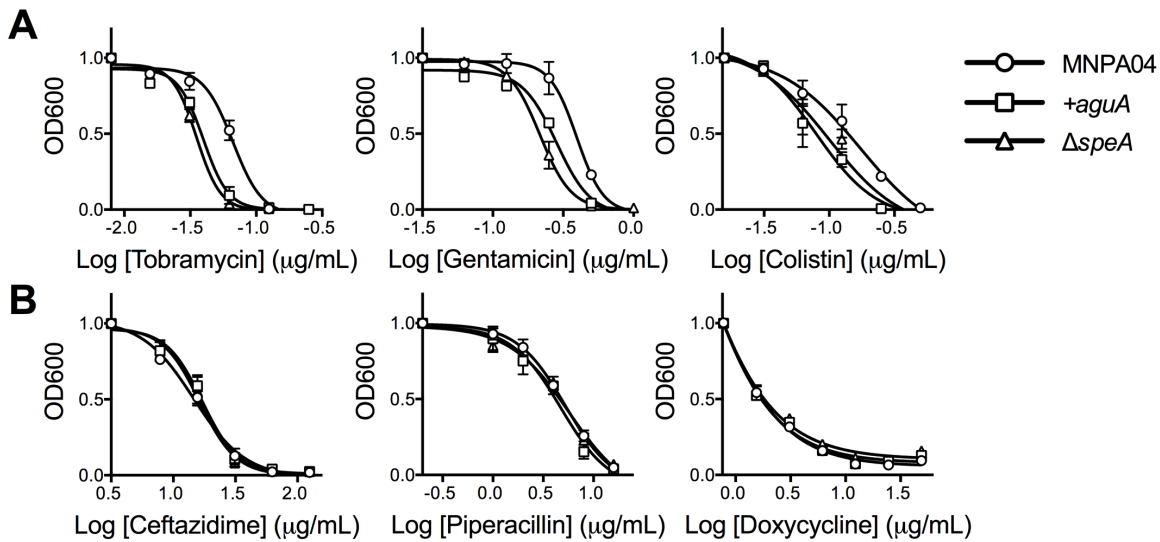

540

541

542

543

544

545

546

547

**Figure 3. Agmatine hyperproduction confers increased tolerance to cationic antibiotics.** (A) Agmatine hyperproduction by clinical isolate MNPA04 confers increased tolerance to the positively charged tobramycin, gentamicin and colistin. Susceptibility is restored when complemented with *aguA* or by deletion of *speA*. (B) No differences in susceptibility were observed for antibiotics with a neutral or negative charge. IC50 values (the concentration of drug required to halve the bacterial density) were determined by non-linear regression analysis using a four-parameter logistic function (see Fig. S2).

548

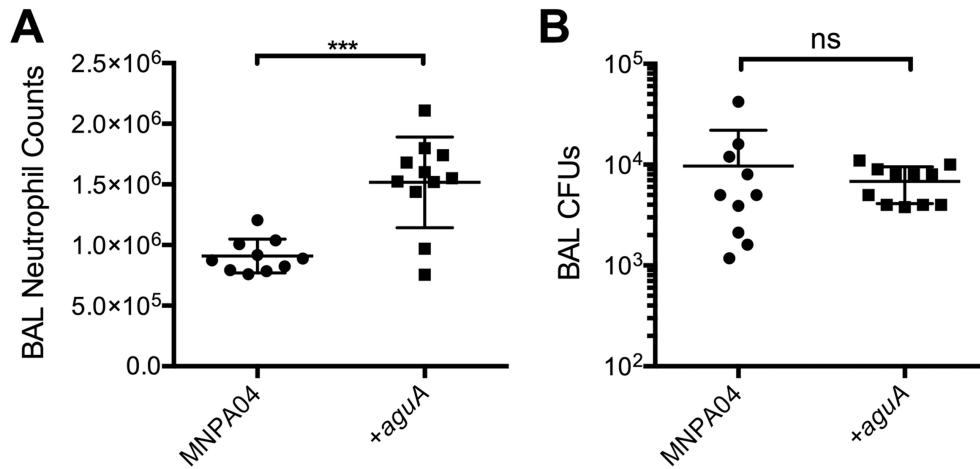

549

550

551

552

553

554

555

556

**Figure 4. Agmatine hyperproduction by *P. aeruginosa* affects neutrophil recruitment to the airways.** Mice were subjected to a 24h airway infection with either MNPA04 (*aguA*-) or a MNPA04+*aguA* strain. (A) Neutrophils counts from the BAL fluids were significantly reduced (P=0.0002) when the mice were challenged with an agmatine overproducing *P. aeruginosa* isolate. (B) Bacterial loads were comparable between treatments, ruling out *in vivo* growth differences. Each data point represents an individual treatment. Means were compared using an unpaired t-test using Welch's correction for variance.

557

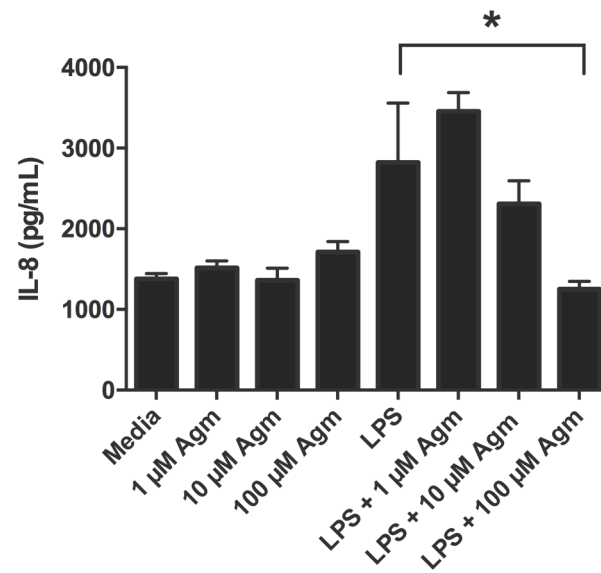

558  
559

**Figure 5. Airway epithelial cell response to agmatine and LPS.** CF-DHBE primary epithelial cells were treated with either agmatine or LPS alone, or agmatine with LPS for 24 hours. Agmatine diminishes the IL-8 response to LPS challenge. Data shown are means + SD (n=3) and were compared using a one-way Friedman's test ( $P=0.0061$ ) with Dunn's multiple comparison post-test. IL-8 levels were significantly reduced for AECs treated with LPS+100μM agmatine relative to LPS alone (1.2 ng/mL;  $P = 0.02$ ).
